# Supplementary material for: Detection of Diffusion Heterogeneity in Single Particle Tracking Trajectories Using a Hidden Markov Model with Measurement Noise Propagation
Source: PLOS journal article supplement (doi:10.1371/journal.pone.0140759), 2015-10-16
Supplement: S6 (10.1371/journal.pone.0140759.s006) [file journal.pone.0140759.s006]

**S2 Table. Influence of noise and S/N on model selection preferences between one-state and two-state diffusion models on LFA-1 data (157 trajectories).**

| <b>Models</b>                        | <b>No preference</b> | <b>One-state diffusion</b> | <b>Two-state diffusion</b> |
|--------------------------------------|----------------------|----------------------------|----------------------------|
| Approximate measurement noise        | 19 (9.7%)            | 132 (67%)                  | 45 (23%)                   |
| No measurement noise and subsampling | 15 (7.7%)            | 130 (66%)                  | 51 (26%)                   |
| No measurement noise                 | 11 (5.6%)            | 85 (43%)                   | 100 (51%)                  |

Approximate measurement noise refers to model selection between one-state and two-state diffusion models with measurement noise incorporated as equations (26) and (38) (with  $\sigma^2 = 41.09\text{nm}^2$ ). No measurement noise is model selection between one-state and two-state diffusion models without measurement noise, posterior as equations (2) and (9). No measurement noise and subsampling is model selection between one-state and two-state diffusion models without measurement noise, as equations (2) and (9), but on trajectories subsampled at a rate equal to the optimum number of MSD points for estimating  $D$ , see S2 Text. For all models the MCMC runs were 20000 steps with a 10000 step burn-in. See Methods for priors and initial conditions.
